---

## Book Reviews

---

G. DITSCHERLEIN: **Nierenveränderungen bei Diabetikern.** Fischer, Jena 1939.

Die Monographie setzt sich zum Ziel, alle für Diabetiker wichtigen Nierenerkrankungen abzuhandeln. Den grössten Raum nimmt dabei ihrer Bedeutung entsprechend die Glomerulosklerose ein. Die weiteren Kapitel beinhalten Arterio-/Arteriolsklerose der Nieren, Pyelonephritis, Markkegelnekrosen sowie in kleineren Beiträgen Glomerulonephritis, sonstige Nierenveränderungen und das kombinierte Vorkommen der wichtigsten Komplikationen. Jedes Kapitel enthält klinische, statistische, epidemiologische, pathogenetische, morphologische und prognostische Angaben. Die Literaturübersicht umfasst mehr als 1000 Titel.  
E. ZINGG, Zürich

**Urologische Operationslehre.** G. W. HEISE und E. HIENZSCH (Hrsg.). Thieme, Leipzig 1970. 159 p., 117 fig. M 50.-.

Die vierte Folge der mit einiger Spannung erwarteten «Urologischen Operationslehre» von G. W. HEISE und E. HIENZSCH beinhaltet das Kapitel über die abdominalen Komplikationen bei und nach urologischen Eingriffen sowie die Operationen an der Harnblase.

Der erste Beitrag, die abdominalen Komplikationen, behandelt von G. ROTHE und Ch. FERBER, gehört zu den besten Abschnitten in den bisherigen Ausgaben, die erschienen sind. Der Rezensent muss sich begnügen, die einzelnen Kapitel lediglich aufzuführen: Komplikationen von seiten des Magens, Duodenums, Dünn- und Dickdarms, die Problematik des Ileus, die Milzverletzungen, die Verletzungen der Cava.

Jeder Abschnitt ist bis in alle Details ausgearbeitet, die Literatur findet weitgehende Berücksichtigung. Vielleicht könnte in der nächsten Auflage der Text teilweise etwas übersichtlicher gestaltet werden.

Der zweite Teil von M. MEBEL über die Operationen an der Harnblase folgt im Aufbau den üblichen Operationslehren: topographische Anatomie, Blut-, Nerven- und Lymphgefässversorgungen. Dann folgen die einzelnen Eingriffe, wobei infolge des relativ kleinen Umfangs des Beitrages (45 Seiten) den einzelnen Operationsverfahren nur wenig Raum gewährt werden kann. Die wichtigsten Eingriffe werden kurz beschrieben, unter Erwähnung von Klinik, Indikation und Technik. Das Bildmaterial ist gut, leider aber etwas spärlich.

Alles in allem ein weiterer guter Band zu dieser Operationslehre, ein Band, der vor allem wegen des ersten Abschnittes in einer urologischen Bibliothek nicht fehlen sollte.

E. ZINGG, Zürich

B. VON RÜTTE: **Die Reizblase der Frau unter spezieller Berücksichtigung funktioneller Untersuchungsmethoden.** Enke, Stuttgart 1970. VII + 159 p., 101 fig., 19 tab. DM 33.-.

Die Reizblase der Frau, charakterisiert durch eine deutliche Diskrepanz zwischen den ausgeprägten subjektiven Beschwerden der Patientin und dem meist normalen urologischen Befund, kann durch folgende Ursachen bedingt sein: organische Veränderungen in nächster Nachbarschaft der Blase, organische Gehirn- und Rückenmarkserkrankungen, Störungen des endokrinen Systems, verbunden mit psychovegetativen Veränderungen. Das Krankheitsbild der Reizblase stellt den Hausarzt, Gynäkologen und häufig auch den Urologen vor eine Vielzahl diagnostischer und therapeutischer Probleme. Die vorliegende Monographie macht sich zur Aufgabe, Diagnostik, Therapie und Problematik des Syn-

droms der Reizblase abzuhandeln, eine Aufgabe, die der Autor gut gelöst hat. Man ist ihm zu Dank verpflichtet, dass er dieses oft vernachlässigte Grenzgebiet übersichtlich dargestellt hat.

Im ersten Abschnitt über die Untersuchungsmethoden wird zuerst die urologische Funktionsdiagnostik (Urethroskopie, Blasenmanometrie, Urometrie und Radiologie) beschrieben. Grosses Gewicht wird auf die Funktionsdiagnostik des hormonalen Systems gelegt. Nach Beschreibung der normalen zyklischen Veränderungen des Vaginalepithels und der Urethraschleimhaut wird dargelegt, wie die Urethralzytologie in zahlreichen Fällen von Reizblasen wertvolle diagnostische Hinweise gibt.

Weitere Abschnitte behandeln den hormonellen Einfluss auf die Blasenfunktion, die Symptomatologie der neurohormonalen Reizblase. Als spezielle Krankheitsbilder werden die Reizblase der Allergiefolge, bei Urethritis atrophicans und infolge Erkrankung anderer Organe besprochen. Den Abschluss bildet ein Kapitel über die Therapie der neurohormonalen Reizblase.

E. ZINGG, Zürich

A. PRILL. **Die neurologische Symptomatologie der Niereninsuffizienz.** Schriftenreihe Neurologie, vol. 2. Springer, Stuttgart 1969. VIII + 177 p., 49 fig. DM 64.-.

In der Schriftenreihe «Neurologie» ist vor kurzem eine interessante Monographie über neurologische Probleme der Niereninsuffizienz erschienen. Bekanntlich sind solche neurologischen Komplikationen im peripheren und zentralen Nervensystem zu beobachten, wobei die nephrogenen Polyneuropathien bisher nie genau abgeklärt worden sind. Es scheint jedoch, dass ein Zusammenhang mit der Serum-Kreatinin-Konzentration besteht. Die Krankheiten des Zentralnervensystems sind vermutlich vor allem mit einer akuten Störung des Elektrolyten-, Wasser- und Säure-Basen-Haushaltes verbunden. Im neurologischen Status können Hyperreflexien, extrapyramidale Hyperkinesien und Myoklonien festgestellt werden. Die zerebralen Läsionen mit Krampfanfällen sehen wir meistens bei der Azidose oder einer Störung des Elektrolytenhaushaltes. Ferner kommt es bei der Niereninsuffizienz zu einem chronischen Psychosyndrom mit Neurasthenie und Reduktion der Leistungsfähigkeit. Alle diese neurologischen Krankheitserscheinungen sind unmittelbare oder mittelbare Folgezustände der nephrogenen Stoffwechselstörungen und in vielen Fällen temporär, wenn die nephrogene Erkrankung durch entsprechende Behandlung erfolgreich bekämpft wird. Dieses Buch von PRILL bringt neue Aspekte der Zusammenhänge zwischen einer schweren Nierenaaffektion und dem Zentralnervensystem bei Patienten, die durch ein Nierenleiden auch allmählich zerebral und peripher erhebliche Schädigungen entwickeln, die bei den chronischen Formen der Nierenaaffektionen als irreversibel zu betrachten sind.

G. MAYOR, Zürich
